# Supplementary material for: Structure Based Multitargeted Molecular Docking Analysis of Selected Furanocoumarins against Breast Cancer
Source: PubMed Central journal article supplement (PMC6823401; doi:10.1038/s41598-019-52162-0), 2019-10-31
Supplement: 41598_2019_52162_MOESM1_ESM.pdf [file 41598_2019_52162_MOESM1_ESM.pdf]

## Structure Based Multitargeted Molecular Docking Analysis of Selected Furanocoumarins against Breast Cancer

Reetuparna Acharya<sup>1</sup>, Shinu Chacko<sup>2,4</sup>, Pritha Bose<sup>1</sup>, Antonio Lapenna<sup>3</sup>, Shakti Prasad Pattanayak<sup>1\*</sup>

<sup>1</sup> Division of Advanced Pharmacology, Department of Pharm. Sciences & Technology, Birla Institute of Technology, Mesra, Ranchi- 835215

<sup>2</sup> Division of Pharmaceutical Chemistry, Department of Pharm. Sciences & Technology, Birla Institute of Technology, Mesra, Ranchi- 835215, Jharkhand

<sup>3</sup> Department of Oncology and Metabolism, University of Sheffield Medical School, Beech Hill Road, Sheffield S102RX, United Kingdom

<sup>4</sup> Research Manager, Clinical Pharmacology and Pharmacokinetics, Sun Pharmaceutical Industries Limited, Gurgaon, India-122015

**\*Corresponding Author:** Dr. Shakti P Pattanayak; **Contact:** +91-9123240698, 0651-2275444/896-Ext. 4832; **E-mail:** [sppattanayak@bitmesra.ac.in](mailto:sppattanayak@bitmesra.ac.in)

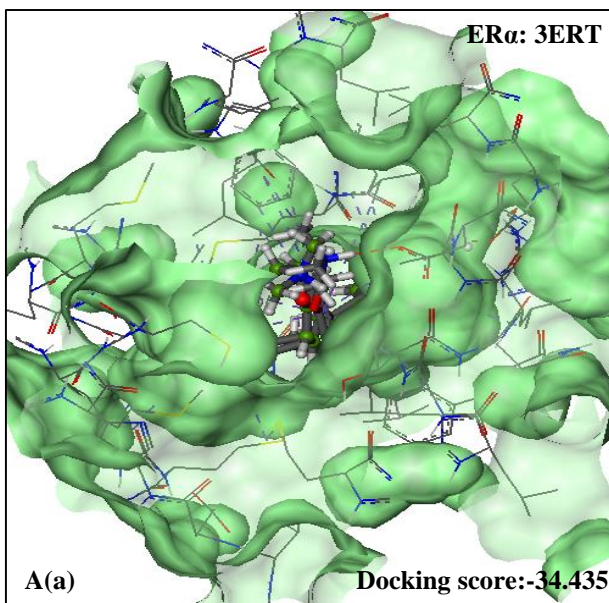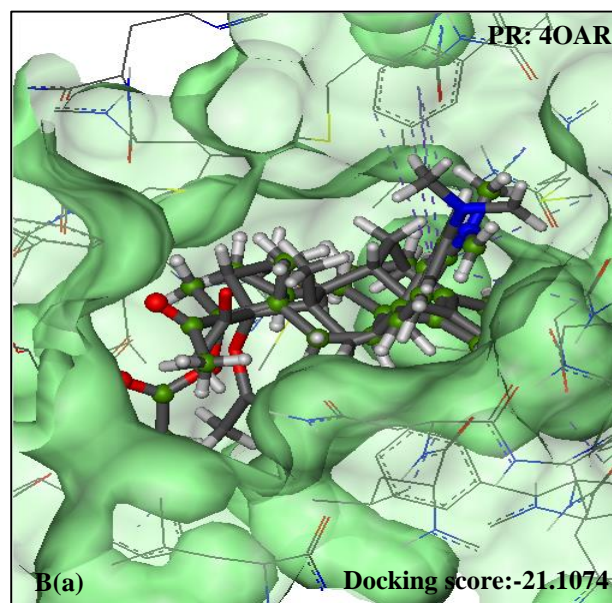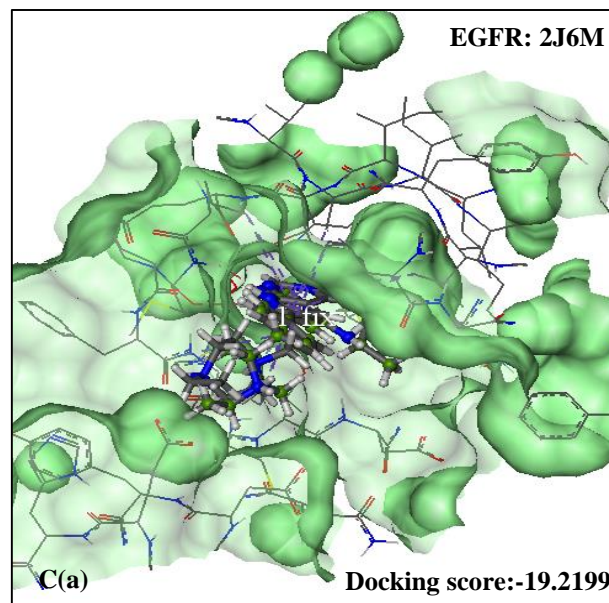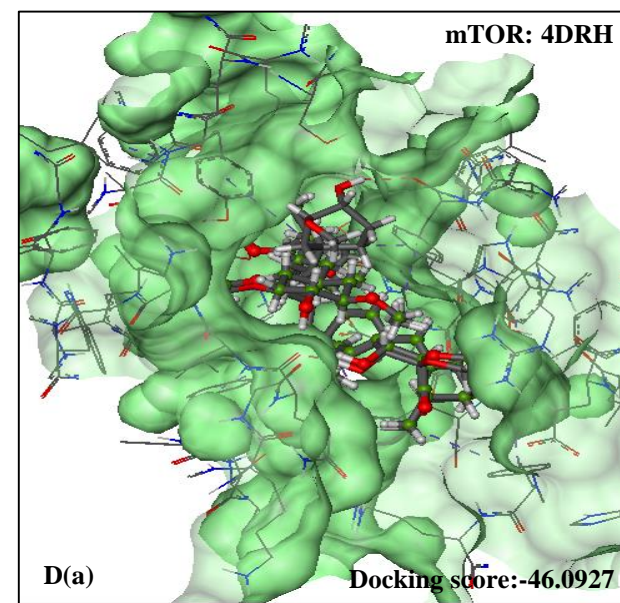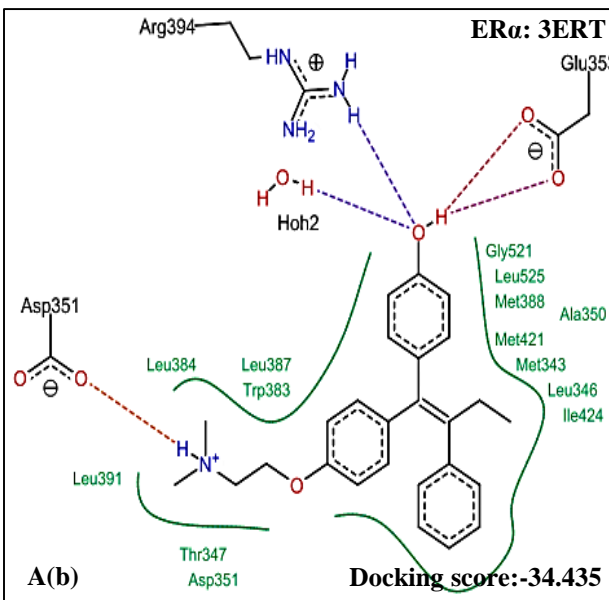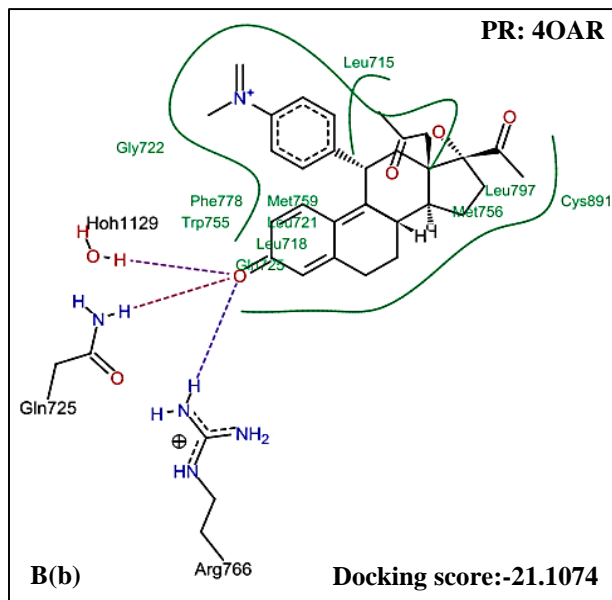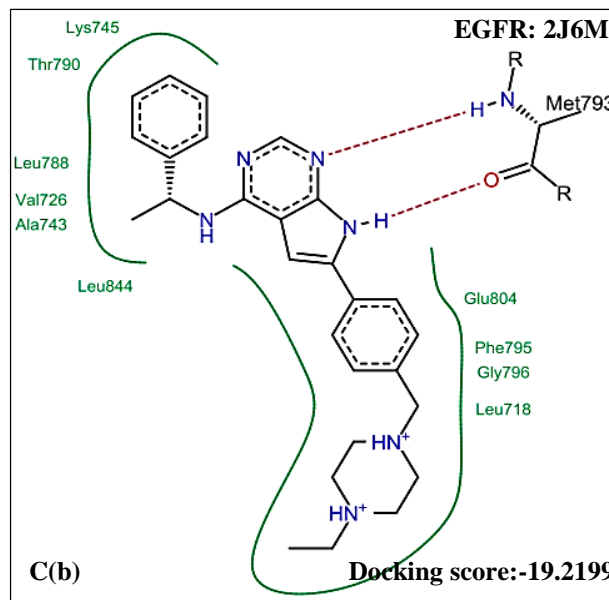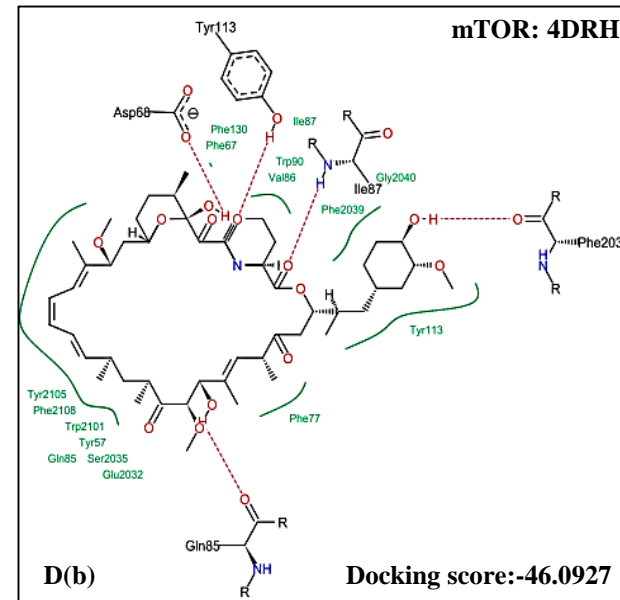

**Fig. S1.** Molecular docking analysis of reference compounds (a): Pose view of interaction of reference compounds with receptors ER $\alpha$ , PR, EGFR and mTOR. (b): Overlay of reference compounds in active pockets of ER $\alpha$ , PR, EGFR and mTOR. ER $\alpha$ : Estrogen receptor, PR: Progesterone receptor, EGFR: Epidermal growth factor receptor and mTOR: Mammalian target of Rapamycin having RMSD values 0.7766 Å, 1.1922 Å, 1.1133 Å and 1.6347 Å respectively.
